# Supplementary material for: Prosocial Behavior Increases with Age across Five Economic Games
Source: PubMed Central journal article supplement (PMC4945042; doi:10.1371/journal.pone.0158671), 2016-07-14
Supplement: pone.0158671.s004.pdf [file pone.0158671.s004.pdf]

### Correlations between all variables used in the analysis

|                        | Beh<br>prosoc  | age            | sex            | SLM            | TDM            | RGM            | CC             | DC             | CD             | DD             | Manipu-<br>lation | Nepo-<br>tism  | Honest        | Risk<br>Avoid  | Asser-<br>tive | PD I          | PD II         | DG            | SD I          | SD II         | TG            | social<br>class | incom<br>e    | college       | Marital<br>status | House<br>Owner-<br>ship | children   |  |  |  |
|------------------------|----------------|----------------|----------------|----------------|----------------|----------------|----------------|----------------|----------------|----------------|-------------------|----------------|---------------|----------------|----------------|---------------|---------------|---------------|---------------|---------------|---------------|-----------------|---------------|---------------|-------------------|-------------------------|------------|--|--|--|
| age                    | .28***<br>408  |                |                |                |                |                |                |                |                |                |                   |                |               |                |                |               |               |               |               |               |               |                 |               |               |                   |                         |            |  |  |  |
| Sex (1=M)              | -.04<br>408    | .03<br>408     |                |                |                |                |                |                |                |                |                   |                |               |                |                |               |               |               |               |               |               |                 |               |               |                   |                         |            |  |  |  |
| SLM                    | .66***<br>408  | .17***<br>408  | -.06<br>408    |                |                |                |                |                |                |                |                   |                |               |                |                |               |               |               |               |               |               |                 |               |               |                   |                         |            |  |  |  |
| TDM                    | .43***<br>384  | -.02<br>384    | -.05<br>384    | .47***<br>384  |                |                |                |                |                |                |                   |                |               |                |                |               |               |               |               |               |               |                 |               |               |                   |                         |            |  |  |  |
| RNG                    | .39***<br>366  | .04<br>366     | .02<br>366     | .42***<br>366  | .33***<br>345  |                |                |                |                |                |                   |                |               |                |                |               |               |               |               |               |               |                 |               |               |                   |                         |            |  |  |  |
| Satisfact'n<br>with CC | .29***<br>408  | -.06<br>408    | -.02<br>408    | .26***<br>408  | .18***<br>384  | .15**<br>366   |                |                |                |                |                   |                |               |                |                |               |               |               |               |               |               |                 |               |               |                   |                         |            |  |  |  |
| Satisfact'n<br>with DC | -.60***<br>408 | -.34***<br>408 | .20***<br>408  | -.48***<br>408 | -.33***<br>384 | -.25***<br>366 | -.19***<br>408 |                |                |                |                   |                |               |                |                |               |               |               |               |               |               |                 |               |               |                   |                         |            |  |  |  |
| Satisfact'n<br>with CD | .08<br>408     | .05<br>408     | .04<br>408     | .10*<br>408    | .09<br>384     | .13*<br>366    | -.22***<br>408 | -.03<br>408    |                |                |                   |                |               |                |                |               |               |               |               |               |               |                 |               |               |                   |                         |            |  |  |  |
| Satisfact'n<br>with DD | -.31***<br>408 | -.18***<br>408 | -.11*<br>408   | -.18***<br>408 | -.11*<br>384   | -.06<br>366    | .02<br>408     | .27***<br>408  | .07<br>408     |                |                   |                |               |                |                |               |               |               |               |               |               |                 |               |               |                   |                         |            |  |  |  |
| Manipula-<br>tion      | -.33***<br>408 | -.24***<br>408 | .07<br>408     | -.28***<br>408 | -.21***<br>384 | -.15**<br>366  | -.04<br>408    | .30***<br>408  | -.17***<br>408 | .04<br>408     |                   |                |               |                |                |               |               |               |               |               |               |                 |               |               |                   |                         |            |  |  |  |
| Nepotism               | -.22***<br>408 | -.21***<br>408 | -.03<br>408    | -.10*<br>408   | -.08<br>384    | -.17**<br>366  | .07<br>408     | .21***<br>408  | -.10<br>408    | .07<br>408     | .30***<br>408     |                |               |                |                |               |               |               |               |               |               |                 |               |               |                   |                         |            |  |  |  |
| Honesty                | .17***<br>408  | .11*<br>408    | .06<br>408     | .22***<br>408  | .13*<br>384    | .16**<br>366   | .24***<br>408  | -.16**<br>408  | -.01<br>408    | -.06<br>408    | -.16***<br>408    | .10*<br>408    |               |                |                |               |               |               |               |               |               |                 |               |               |                   |                         |            |  |  |  |
| Risk avoidance         | -.18***<br>408 | -.03<br>408    | -.19***<br>408 | -.12*<br>408   | -.19***<br>384 | -.18***<br>366 | -.05<br>408    | .06<br>408     | -.17***<br>408 | .15**<br>408   | .09<br>408        | .30***<br>408  | .050<br>408   |                |                |               |               |               |               |               |               |                 |               |               |                   |                         |            |  |  |  |
| Assertive-<br>ness     | -.09<br>408    | .01<br>408     | .16**<br>408   | -.06<br>408    | -.04<br>384    | -.08<br>366    | .00<br>408     | .06<br>408     | -.06<br>408    | .05<br>408     | .12*<br>408       | .24***<br>408  | .27***<br>408 | .08<br>408     |                |               |               |               |               |               |               |                 |               |               |                   |                         |            |  |  |  |
| PD-I                   | .73***<br>408  | .19***<br>408  | -.01<br>408    | .42***<br>408  | .30***<br>384  | .26***<br>366  | .25***<br>408  | -.53***<br>408 | .08<br>408     | -.25***<br>408 | -.28***<br>408    | -.19***<br>408 | .13**<br>408  | -.17***<br>408 | -.05<br>408    |               |               |               |               |               |               |                 |               |               |                   |                         |            |  |  |  |
| PD-II                  | .82***<br>408  | .20***<br>408  | .00<br>408     | .46***<br>408  | .31***<br>384  | .29***<br>366  | .25***<br>408  | -.42***<br>408 | .06<br>408     | -.28***<br>408 | -.21***<br>408    | -.13**<br>408  | .09<br>408    | -.11*<br>408   | -.07<br>408    | .46***<br>408 |               |               |               |               |               |                 |               |               |                   |                         |            |  |  |  |
| DG                     | .80***<br>408  | .28***<br>408  | -.13**<br>408  | .60***<br>408  | .41***<br>384  | .32***<br>366  | .17***<br>408  | -.55***<br>408 | .08<br>408     | -.20***<br>408 | -.32***<br>408    | -.19***<br>408 | .19***<br>408 | -.13**<br>408  | -.05<br>408    | .51***<br>408 | .51***<br>408 |               |               |               |               |                 |               |               |                   |                         |            |  |  |  |
| SD-I                   | .78***<br>408  | .15**<br>408   | .05<br>408     | .48***<br>408  | .30***<br>384  | .32***<br>366  | .23***<br>408  | -.35***<br>408 | .09<br>408     | -.27***<br>408 | -.20***<br>408    | -.17***<br>408 | .10*<br>408   | -.16**<br>408  | -.09<br>408    | .43***<br>408 | .68***<br>408 | .46***<br>408 |               |               |               |                 |               |               |                   |                         |            |  |  |  |
| SD-II                  | .67***<br>352  | .13*<br>352    | .08<br>352     | .48***<br>352  | .33***<br>333  | .29***<br>325  | .28***<br>352  | -.31***<br>352 | .04<br>352     | -.24***<br>352 | -.18***<br>352    | -.08<br>352    | .16**<br>352  | -.11*<br>352   | -.08<br>352    | .44***<br>352 | .58***<br>352 | .47***<br>352 | .64***<br>352 |               |               |                 |               |               |                   |                         |            |  |  |  |
| TG                     | .84***<br>408  | .28***<br>408  | -.08<br>408    | .65***<br>408  | .40***<br>384  | .35***<br>366  | .24***<br>408  | -.50***<br>408 | .00<br>408     | -.21***<br>408 | -.31***<br>408    | -.18***<br>408 | .18***<br>408 | -.13**<br>408  | -.09<br>408    | .50***<br>408 | .60***<br>408 | .69***<br>408 | .52***<br>408 | .50***<br>352 |               |                 |               |               |                   |                         |            |  |  |  |
| social class           | .03<br>408     | .22***<br>408  | -.01<br>408    | .02<br>408     | .00<br>384     | -.01<br>366    | -.04<br>408    | -.02<br>408    | .06<br>408     | -.07<br>408    | -.10*<br>408      | .03<br>408     | .05<br>408    | -.06<br>408    | .06<br>408     | -.06<br>408   | .04<br>408    | .04<br>408    | .00<br>408    | .03<br>352    | .08<br>408    |                 |               |               |                   |                         |            |  |  |  |
| Annual income          | .03<br>407     | .25***<br>407  | .55***<br>407  | -.05<br>407    | -.07<br>383    | .02<br>366     | -.01<br>407    | .10<br>407     | -.04<br>407    | -.12*<br>407   | .05<br>407        | -.02<br>407    | .11*<br>407   | -.16**<br>407  | .21***<br>407  | -.03<br>407   | .05<br>407    | .01<br>407    | .06<br>407    | .03<br>352    | .03<br>407    | .27***<br>407   |               |               |                   |                         |            |  |  |  |
| 4-year college         | .01<br>408     | -.04<br>408    | .12*<br>408    | .02<br>408     | .04<br>384     | .00<br>366     | .12*<br>408    | .05<br>408     | .04<br>408     | -.10*<br>408   | .05<br>408        | .09<br>408     | .08<br>408    | -.10*<br>408   | .08<br>408     | -.03<br>408   | .02<br>408    | -.02<br>408   | .03<br>408    | .02<br>352    | -.04<br>408   | .16**<br>408    | .18***<br>407 |               |                   |                         |            |  |  |  |
| Marital status         | .14**<br>408   | .49***<br>408  | -.01<br>408    | .09<br>408     | .01<br>384     | -.03<br>366    | -.04<br>408    | -.19***<br>408 | -.03<br>408    | -.15**<br>408  | -.15**<br>408     | -.05<br>408    | .04<br>408    | -.02<br>408    | .020<br>408    | .06<br>408    | .14**<br>408  | .11*<br>408   | .06<br>408    | .07<br>352    | .20***<br>408 | .36***<br>408   | .17***<br>407 | -.01<br>408   |                   |                         |            |  |  |  |
| House<br>Ownership     | .10<br>398     | .45***<br>398  | -.12*<br>398   | .09<br>398     | -.02<br>374    | -.05<br>359    | .00<br>398     | -.19***<br>398 | -.08<br>398    | -.06<br>398    | -.17***<br>398    | .01<br>398     | .09<br>398    | .00<br>398     | -.03<br>398    | .06<br>398    | .07<br>398    | .12*<br>398   | .02<br>398    | .03<br>344    | .13*<br>398   | .33***<br>398   | .09<br>398    | .01<br>398    | .53***<br>398     |                         |            |  |  |  |
| Number of<br>children  | .12*<br>408    | .52***<br>408  | .01<br>408     | .06<br>408     | -.04<br>384    | -.05<br>366    | -.04<br>408    | -.18***<br>408 | -.03<br>408    | -.08<br>408    | -.11*<br>408      | -.09<br>408    | .00<br>408    | -.05<br>408    | .02<br>408     | .07<br>408    | .11*<br>408   | .12*<br>408   | .05<br>408    | .05<br>352    | .13**<br>408  | .20***<br>408   | .16**<br>407  | -.12*<br>408  | .54***<br>408     | .40***<br>398           |            |  |  |  |
| Number of<br>siblings  | .05<br>408     | .07<br>408     | .04<br>408     | -.01<br>408    | .02<br>384     | .10<br>366     | -.04<br>408    | -.07<br>408    | .04<br>408     | -.07<br>408    | .01<br>408        | -.04<br>408    | .13*<br>408   | -.03<br>408    | .06<br>408     | .11*<br>408   | .02<br>408    | .00<br>408    | .00<br>408    | .00<br>352    | .06<br>408    | .01<br>408      | .08<br>407    | -.16**<br>408 | .03<br>408        | .00<br>398              | .04<br>408 |  |  |  |

\* $P < .05$ , \*\* $P < .01$ , \*\*\* $P < .001$ ; Lower entries are numbers of participants.
